# Supplementary material for: Teaching with digital geology in the high Arctic: opportunities and challenges
Source: Copernicus journal article supplement (doi:10.5194/gc-4-399-2021), 2021-09-28
Supplement: Supplementary file 1 [file gc-4-399-2021-supplement.zip]

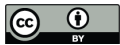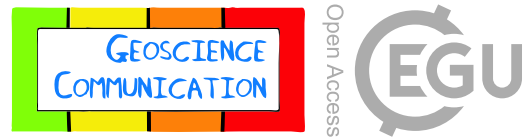

## *Supplement of*

# **Teaching with digital geology in the high Arctic: opportunities and challenges**

**Kim Senger et al.**

*Correspondence to:* Kim Senger ([kim.senger@unis.no](mailto:kim.senger@unis.no))

- [gc-4-399-2021-supplement-title-page.pdf](#)
- [2019\\_AG209.gpx](#)
- [AG209\\_2016.gpx](#)
- [Track\\_2019-03-11 183408.gpx](#)
- [Track\\_2019-03Y25 165617 AG222-BOTNEHEIA.gpx](#)
- [Track\\_2019-04-04 133857AG222PYRAM.gpx](#)
- [Track\\_Ag222 botneheia.gpx](#)

The copyright of individual parts of the supplement might differ from the article licence.
